# Supplementary material for: A Novel Methodology for Simultaneous Minimization of Manufacturing Objectives in Tolerance Allocation of Complex Assembly
Source: MDPI journal article supplement (doi:10.3390/app11199164), 2021-10-02
Supplement: s1 [file s1]

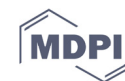

### Supplemental Materials

Table S1. Summary of literature survey

| Author's Name                         | Methodology/Tools used |    |     |    | Type of cost function |     | Example product |    |    | Objective function |    |    | APS | AMS | Tolerance allocation model |     |
|---------------------------------------|------------------------|----|-----|----|-----------------------|-----|-----------------|----|----|--------------------|----|----|-----|-----|----------------------------|-----|
|                                       | MHM                    | HM | LMM | OM | DCF                   | CCF | SA              | CA | NA | MC                 | QC | MT |     |     | WC                         | RSS |
| Zhang and Wang (1993) [7]             | √                      |    |     |    |                       | √   |                 | √  |    |                    | √  |    |     |     |                            | √   |
| Zhang and Wang (1993a) [42]           | √                      |    |     |    |                       | √   | √               |    |    |                    | √  |    | √   |     |                            | √   |
| Vasseur <i>et al.</i> (1997) [1]      | √                      |    |     |    |                       | √   | √               |    |    |                    | √  | √  |     |     |                            | √   |
| Zhang and Wang (1998) [67]            | √                      |    |     |    |                       | √   |                 | √  |    |                    | √  |    |     |     |                            | √   |
| Ji <i>et al.</i> (2000) [8]           | √                      |    |     |    |                       | √   | √               |    |    |                    | √  | √  |     |     |                            | √   |
| Carfagni <i>et al.</i> (2001) [54]    | √                      |    |     |    |                       | √   | √               |    |    |                    | √  |    |     |     |                            | √   |
| Uttam (2001) [9]                      | √                      |    |     |    |                       | √   | √               |    |    |                    | √  |    | √   | √   |                            | √   |
| Ming and Mak (2001) [43]              | √                      |    |     | √  |                       | √   | √               |    |    |                    | √  |    | √   |     |                            | √   |
| Singh <i>et al.</i> (2003) [10]       | √                      |    |     |    |                       | √   |                 | √  |    |                    | √  |    | √   |     |                            | √   |
| Singh <i>et al.</i> (2004) [12]       | √                      |    |     |    |                       | √   |                 | √  | √  |                    | √  |    |     |     |                            | √   |
| Prabhakaran <i>et al.</i> (2004) [11] | √                      |    |     |    |                       | √   | √               |    | √  |                    | √  |    |     |     |                            | √   |
| Singh <i>et al.</i> (2004a) [12]      | √                      |    |     |    |                       | √   |                 | √  | √  |                    | √  |    | √   |     |                            | √   |
| Singh <i>et al.</i> (2005) [65]       | √                      |    |     |    |                       | √   |                 | √  |    |                    | √  |    | √   |     |                            | √   |
| Prabhakaran <i>et al.</i> (2005) [62] | √                      |    |     |    |                       | √   | √               |    | √  |                    | √  |    |     |     |                            | √   |
| Etienne et al. (2008) [13]            | √                      |    |     |    |                       | √   | √               |    |    |                    | √  |    | √   |     |                            | √   |
| Wu et al. (2009) [14]                 | √                      |    |     | √  |                       | √   |                 |    | √  |                    | √  |    |     |     |                            | √   |

|                                           |   |   |   |   |   |   |   |   |   |   |   |   |
|-------------------------------------------|---|---|---|---|---|---|---|---|---|---|---|---|
| Kumar et al. (2009) [59]                  | √ |   |   |   | √ | √ |   | √ |   | √ |   | √ |
| Sivakumar et al. (2011) [16]              | √ |   |   |   | √ | √ |   | √ |   | √ |   | √ |
| Sivasubramanian and Sivakumar (2010) [17] | √ |   |   |   | √ |   | √ |   | √ | √ | √ | √ |
| Sampath Kumar et al. (2010) [32]          | √ |   |   |   | √ | √ |   | √ | √ |   |   | √ |
| Rao (2011) [33]                           | √ |   |   |   | √ | √ |   | √ | √ |   |   | √ |
| Sivakumar et al. (2012) [66]              | √ |   |   |   | √ | √ | √ | √ |   |   |   | √ |
| Geetha et al. (2013) [38]                 | √ |   |   |   | √ |   | √ | √ | √ | √ | √ | √ |
| Kim <i>et al.</i> (1999) [18]             |   | √ |   |   | √ | √ |   | √ |   | √ |   | √ |
| Gadallah (2011) [19]                      |   | √ |   |   | √ | √ |   | √ |   |   |   | √ |
| Chase <i>et al.</i> (1990) [5]            |   |   | √ | √ | √ | √ |   | √ |   |   |   | √ |
| Chen (1996) [55]                          |   |   | √ |   | √ | √ |   | √ |   |   |   | √ |
| Christopher <i>et al.</i> (2003)          |   |   | √ |   | √ |   | √ | √ |   |   |   | √ |
| Cheng and Tsai (2011) [2]                 |   |   | √ |   | √ |   | √ | √ |   |   |   | √ |
| Cheng and Tsai (2013) [3]                 |   |   | √ |   | √ | √ |   | √ |   |   |   | √ |
| Liu and Jin (2013) [35]                   |   |   | √ |   | √ | √ |   | √ | √ |   |   | √ |
| Ostwald <i>et al.</i> (1997) [31]         |   |   |   | √ |   | √ |   | √ |   |   |   | √ |
| Loosli (1987) [60]                        |   |   | √ |   | √ | √ |   | √ |   | √ |   | √ |
| Wu <i>et al.</i> (1988) [14]              |   |   | √ |   | √ | √ |   | √ | √ |   |   | √ |
| Lee and Woo (1989) [20]                   |   |   | √ |   | √ | √ | √ | √ |   |   |   | √ |
| Dong <i>et al.</i> (1990) [57]            |   |   | √ |   | √ |   | √ | √ |   |   |   | √ |
| Nagarwala et al. (1995) [61]              |   |   | √ |   | √ | √ |   | √ |   | √ |   | √ |
| Feng and Kusiak (1997) [4]                |   |   | √ | √ |   | √ |   | √ | √ |   |   | √ |
| Chase (1999) [26]                         |   |   | √ | √ |   | √ |   | √ |   |   |   | √ |
| Feng and Kusiak (2000) [21]               |   |   | √ |   | √ | √ |   | √ |   | √ |   | √ |
| Diplaris and Sfantsikopoulos (2001) [56]  |   |   | √ |   | √ | √ |   | √ |   |   |   | √ |

|                                          |   |   |   |   |   |   |   |
|------------------------------------------|---|---|---|---|---|---|---|
| Choi <i>et al.</i> (2000) [38]           | ✓ | ✓ |   | ✓ | ✓ | ✓ | ✓ |
| Chou and Chang (2001) [39]               | ✓ | ✓ | ✓ |   | ✓ | ✓ | ✓ |
| Jeang and Chang (2002) [68]              | ✓ | ✓ |   | ✓ | ✓ |   | ✓ |
| Ye and Salustri (2003) [40]              | ✓ | ✓ | ✓ |   | ✓ | ✓ | ✓ |
| Rao and Wu (2005) [63]                   | ✓ | ✓ |   | ✓ |   |   | ✓ |
| Savage <i>et al.</i> (2005) [64]         | ✓ | ✓ |   | ✓ | ✓ |   | ✓ |
| Huang and Shiau (2006) [69]              | ✓ | ✓ |   | ✓ | ✓ |   | ✓ |
| Gopalakrishnan <i>et al.</i> (2007) [41] | ✓ | ✓ | ✓ |   | ✓ | ✓ | ✓ |
| Li <i>et al.</i> (2008) [44]             | ✓ | ✓ |   | ✓ | ✓ |   | ✓ |
| Janakiraman and Saravanan (2010) [58]    | ✓ | ✓ | ✓ |   | ✓ |   | ✓ |
| Jayaprakash <i>et al.</i> (2012) [6]     | ✓ | ✓ | ✓ |   | ✓ |   | ✓ |
| Hung and Chan (2013) [45]                | ✓ | ✓ | ✓ | ✓ | ✓ |   | ✓ |
| Barari (2013) [46]                       | ✓ | ✓ |   | ✓ | ✓ |   | ✓ |

MHM – Meta-Heuristic Method; HM – Heuristic Method; LMM – Lagrange’s Multiplier Method; OM – Other Methods; DCF – Discrete Cost Function; CCF – Continuous Cost Function; SA – Simple / Linear Assembly; CA – Complex Assembly; NA – Non-linear Assembly; MC – Manufacturing Cost/Tolerance Cost; QC – Quality Cost; MT – Machining Time; APS – Alternative Process Selection; AMS – Alternative Machine Selection; WC – Worst-Case; RSS – Root Sum Square method;

**Table S2.** Feasibility Matrix for WMA [Geetha et al. (2013)]

|                   |           | Process numbers |           |           |           |           |
|-------------------|-----------|-----------------|-----------|-----------|-----------|-----------|
|                   |           | <i>P1</i>       | <i>P2</i> | <i>P3</i> | <i>P4</i> | <i>P5</i> |
| Operation numbers | <i>O1</i> | 1               | 1         | 0         | 1         | 0         |
|                   | <i>O2</i> | 1               | 0         | 1         | 0         | 1         |
|                   | <i>O3</i> | 0               | 1         | 0         | 1         | 0         |
|                   | <i>O4</i> | 0               | 0         | 1         | 0         | 1         |
|                   | <i>O5</i> | 1               | 0         | 0         | 1         | 0         |
|                   | <i>O6</i> | 0               | 1         | 0         | 0         | 1         |
|                   | <i>O7</i> | 0               | 0         | 1         | 1         | 0         |
|                   | <i>O8</i> | 1               | 1         | 0         | 0         | 0         |
| Machine numbers   | <i>M1</i> | 1               | 0         | 1         | 0         | 1         |
|                   | <i>M2</i> | 0               | 1         | 0         | 1         | 1         |
|                   | <i>M3</i> | 1               | 1         | 1         | 1         | 0         |
|                   | <i>M4</i> | 0               | 0         | 1         | 0         | 1         |

**Table S3.** Cost and Time Function Constants for WMA [Geetha et al. (2013)]

|                                                   |                        | Process number |           |           |           |           |
|---------------------------------------------------|------------------------|----------------|-----------|-----------|-----------|-----------|
|                                                   |                        | <i>P1</i>      | <i>P2</i> | <i>P3</i> | <i>P4</i> | <i>P5</i> |
| Cost function constant                            | <i>a</i>               | 1.4            | 1.5       | 0.9       | 2.5       | 1.9       |
|                                                   | <i>b</i>               | 0.24           | 0.22      | 0.18      | 0.23      | 0.15      |
| Time function constant                            | <i>X1</i>              | 2              | 5         | 3         | 4.5       | 3         |
|                                                   | <i>Y1</i>              | 0.4            | 0.2       | 0.8       | 0.5       | 0.2       |
| Process capability limits in mm                   | <i>t<sub>min</sub></i> | 0.01           | 0.03      | 0.02      | 0.03      | 0.009     |
|                                                   | <i>t<sub>max</sub></i> | 0.08           | 0.09      | 0.07      | 0.13      | 0.1       |
| Cost and Time manipulating Factor Machine Numbers | <i>M1</i>              | 0.8            | 0         | 0.85      | 0         | 1.08      |
|                                                   | <i>M2</i>              | 0              | 0.85      | 0         | 1.11      | 1.01      |
|                                                   | <i>M3</i>              | 1.15           | 1         | 0.9       | 0.95      | 0         |
|                                                   | <i>M4</i>              | 0              | 0         | 1.02      | 0         | 0.8       |

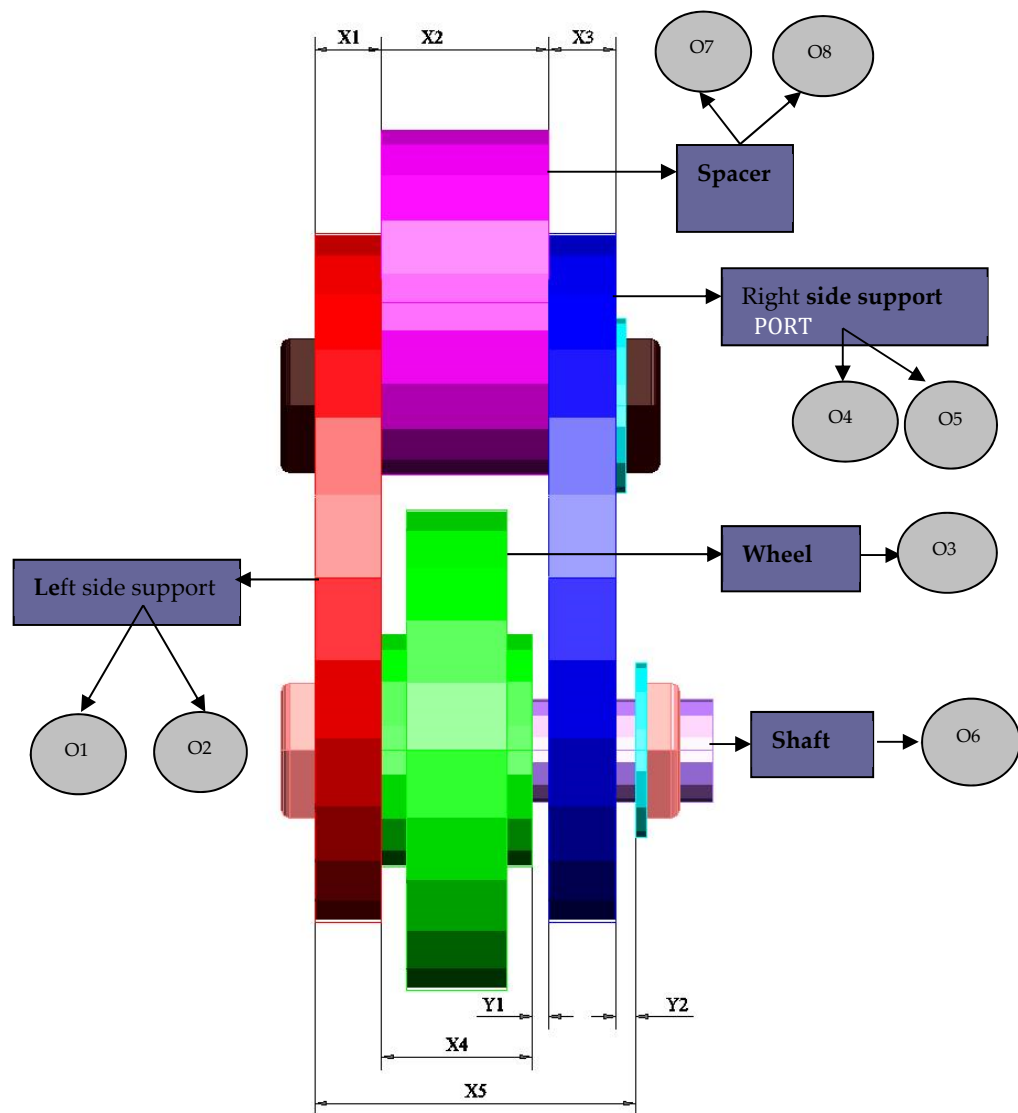

**Figure S1:** Wheel Mounting Assembly (WMA) [Geetha et al. (2013)]

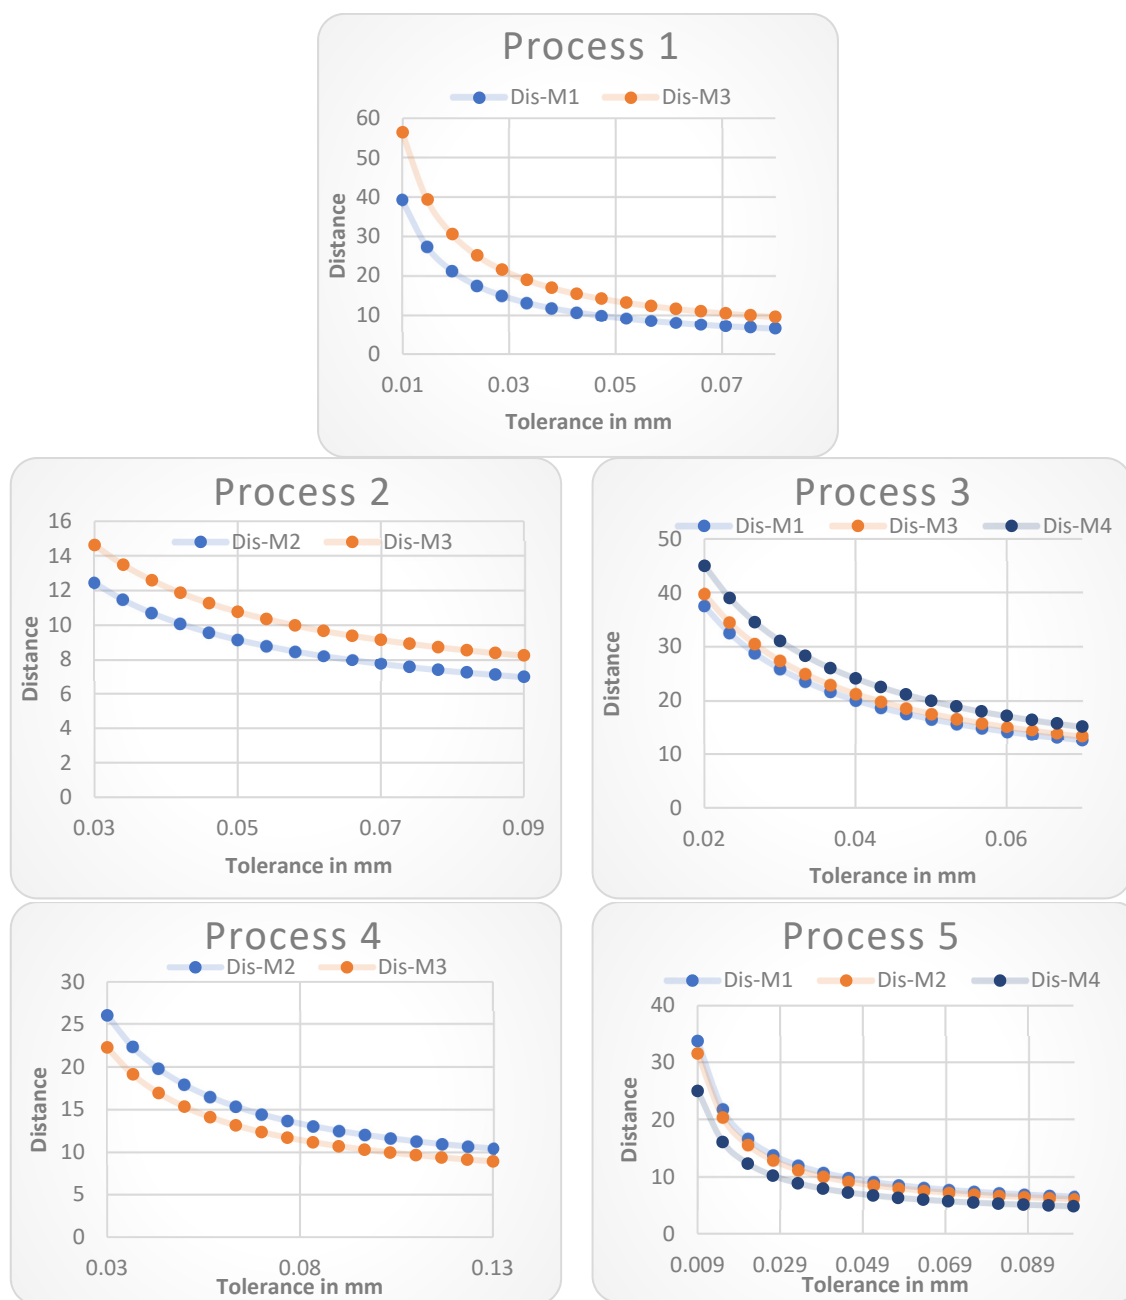

**Figure S2:** Selection of best machine for process number 1 to 5 to manufacture WMA

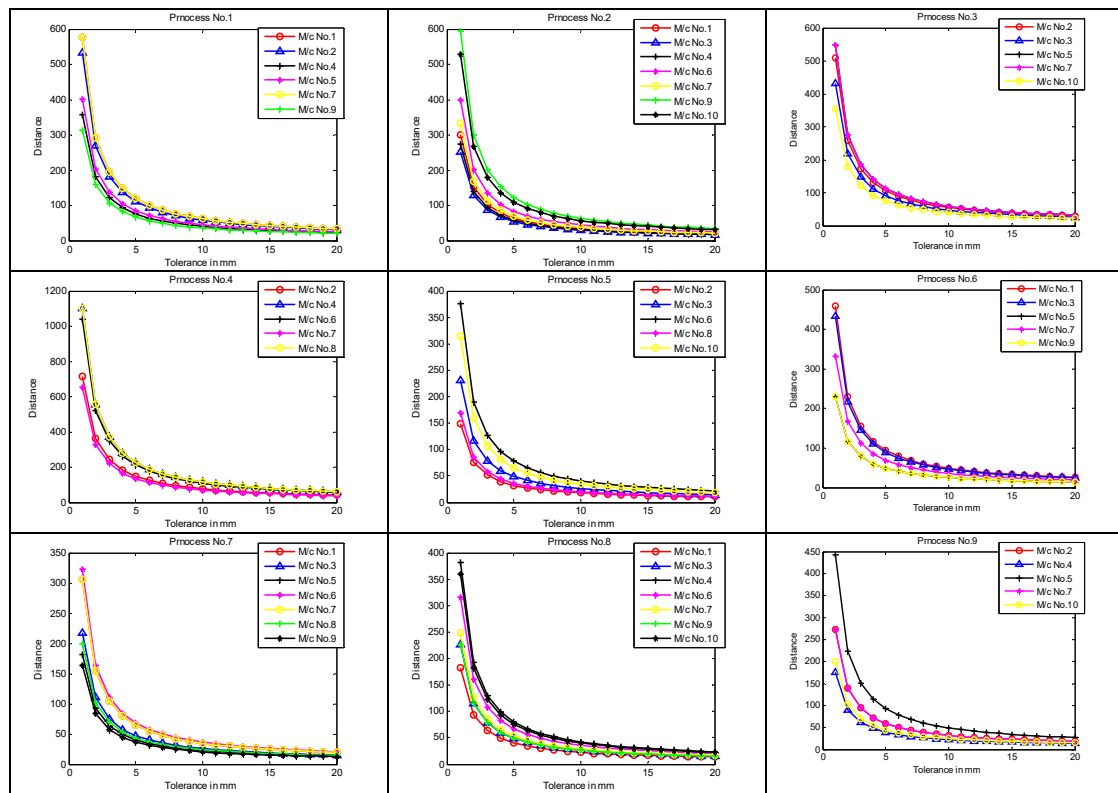

**Figure S3:** Selection of best machine for process number 1 to 9 to manufacture KJA

#### Pseudocode of Whale Optimization Algorithm with Univariate search method

Initialize no. of Whales' position as tolerance of each sub-stage/operation ( $t_{ij}$ , where  $i=1,2,..nw$  and  $j=1,2,..no$ )

While ( $it < nitr$ )

For each whale  $i=1$  to  $nw$

Determine the assembly tolerance ( $t_{ay}$ ) using equations (19) and (21)

Check  $t_{ay}$  within the specified tolerance value  $t_y$

For each operation  $j=1$  to  $no$

For each alternative process of operation  $k=1$  to  $npo(j)$

Calculate  $TC_{ijk}$  and  $MT_{ijk}$  using equations (2) and (3)

Calculate  $dis_{ejk}$  using equation (13)

End

Select the process corresponding to minimum value of  $dis_{ijk}$

as  $bp=j$ , its  $TC_{ij}$  as  $bTC_i$  and  $MT_{ij}$  as  $bMT_i$

End

Compute  $C$  and  $T$  using equations (22) and (23)

Calculate fitness function  $F_i$  using equation (13)

Calculate machine engage time ( $met$ ) and check with machine available

time ( $amt$ )

End

Sort  $F_i$  in ascending order and store the first whale's fitness value as  $F_{it}$ , position

as  $X_{it}$ . and save its corresponding  $bp$ ,  $bTC$ ,  $bMT$ ,  $C$ ,  $T$  and  $F$

Using the sorted data, assign  $X_p = X_1$ .

Compute  $a = 2 - it * (\frac{2}{nitr})$  and  $a2 = -1 + it * (\frac{-1}{nitr})$

For each whale

Update the position using

$A=2*a*rand()-a$  and  $G=2*rand()$  and  $l=(a2-1)*rand()+1$  and  $p=rand()$

If  $p < 0.5$

If  $abs(A) \geq 1$

$D_i = abs(G * X_r - X_i)$  and  $X_i = X_r - A * D_i$

If  $abs(A) < 1$

$D_i = abs(G * X_p - X_i)$  and  $X_i = X_p - A * D_i$

If  $p \geq 0.5$

$D_i = abs(X_p - X_i)$  and  $X_i = X_p + D_i * Exp^{b * l} * cos(2\pi l)$

Check  $X_i$  within bounds

End

End

Sort  $F_{it}$  in ascending order and display the first data's position as the optimal allocated tolerance, bP as the best process, bTC and bMT as minimum tolerance cost and machining time of each operation and C, T as optimum manufacturing cost and machining time.
